# Supplementary material for: Knowledge, Attitude and Practice towards the COVID-19 Pandemic: A Cross-Sectional Survey Study among the General Public in the Kingdom of Saudi Arabia
Source: MDPI journal article supplement (doi:10.3390/vaccines10111945), 2022-11-17
Supplement: s1 [file s1]

# SURVEY ON COVID-19 DISEASE

**DIRECTIONS:** The information you supply on this questionnaire will be kept confidential. The data will be used for research purposes.

Mark the single most appropriate response in each case. If, however, any question requests information that you do not wish to provide, feel free to omit it.

## **SECTION I- BACKGROUND INFORMATION**

1. What is your gender?
  - a) Male
  - b) Female
2. How old are you?
  - a) 18 - 27
  - b) 28 - 37
  - c) 38 - 47
  - d) 48 - 57
  - e) 58 – 67
  - f) Older than 68
3. What is your highest level of education?
  - a) Primary school and below (Upto grade 6 and below)
  - b) Secondary school (Grade 7 to grade 12)
  - c) Bachelor
  - d) Diploma
  - e) Master
  - f) PhD
4. Are you married?
  - a) No
  - b) Yes
  - c) Divorced
  - d) Widowed
5. What is your occupation?
  - a) Self-employed
  - b) Non-government employee
  - c) Government employee
  - d) Retired
  - e) Student
  - e) Unemployed

## **SECTION II- KNOWLEDGE REGARDING THE NATURE OF DISEASE & ITS MODES OF TRANSMISSION**

| Item Number | Statement                                                             | Yes | No | Not sure |
|-------------|-----------------------------------------------------------------------|-----|----|----------|
| 6           | <b>COVID-19 illnesses are caused by-</b>                              |     |    |          |
|             | i. Viruses                                                            |     |    |          |
|             | ii. Bacteria/Mosquitoes                                               |     |    |          |
| 7           | <b>COVID-19 illnesses spreads by-</b>                                 |     |    |          |
|             | i. Air/droplets                                                       |     |    |          |
|             | ii. Blood                                                             |     |    |          |
|             | iii. Water                                                            |     |    |          |
|             | iv. COVID-19 carriers can transmit the infection                      |     |    |          |
|             | v. Through a person with NO symptoms                                  |     |    |          |
|             | vi. Sharing towels with an infected person                            |     |    |          |
|             | vii. Shaking the hands of an infected person with a cough and/or cold |     |    |          |

|   |                                                                                      |  |  |  |
|---|--------------------------------------------------------------------------------------|--|--|--|
|   | viii. From one person to another in the family                                       |  |  |  |
| 8 | <b>The following persons are at an increased risk of COVID-19 illnesses-</b>         |  |  |  |
|   | i. Senior citizens aged 65 and older                                                 |  |  |  |
|   | ii. Smokers                                                                          |  |  |  |
|   | iii. Asthmatics                                                                      |  |  |  |
|   | iv. Diabetes                                                                         |  |  |  |
|   | v. Those in crowded places/among a lot of people                                     |  |  |  |
| 9 | <b>Is there any vaccine/medicine available in market to cure COVID-19 illnesses?</b> |  |  |  |

### **SECTION III - ATTITUDE TOWARD COVID-19 DISEASE PREVENTION**

| Item Number | Statement                                                                       | Yes | No | Not sure |
|-------------|---------------------------------------------------------------------------------|-----|----|----------|
| 10          | <b>Welcome a neighbor recovering from COVID-19</b>                              |     |    |          |
| 11          | <b>Keep information secret if any of your known gets COVID-19</b>               |     |    |          |
| 12          | <b>A contact case be quarantine/self-isolate for 14 days</b>                    |     |    |          |
| 13          | <b>Supporting COVID-19 patients improves community health</b>                   |     |    |          |
| 14          | <b>I have no concern of being infected with COVID-19</b>                        |     |    |          |
| 15          | <b>I feel that someone who has cold/cough should-</b>                           |     |    |          |
|             | i. cover his mouth and nose with his bare hand when coughing or sneezing        |     |    |          |
|             | ii. cover his mouth and nose with a flexed elbow when coughing or sneezing      |     |    |          |
| 16          | <b>Using a hand wash can prevent this illness</b>                               |     |    |          |
| 17          | <b>Wearing a well-fitting face mask is effective in preventing this illness</b> |     |    |          |

### **SECTION IV – PRACTICE RELATED TO COVID-19 PREVENTION**

| Item Number | Items on Plagiarism                                                                | Always | Occasionally | Never |
|-------------|------------------------------------------------------------------------------------|--------|--------------|-------|
| 18          | <b>The following practices can help protect you from COVID-19 illnesses-</b>       |        |              |       |
|             | i. Ensuring a healthy diet                                                         |        |              |       |
|             | ii. Maintain at least 1 metre distance between you and people coughing or sneezing |        |              |       |
|             | iii. Washing your hands with hand sanitizers                                       |        |              |       |
|             | iv. Wearing a face mask                                                            |        |              |       |
|             | v. Coughing into a flexed elbow                                                    |        |              |       |
|             | vi. Avoid touching your face                                                       |        |              |       |
|             | vii. Refrain from smoking and other activities that weaken the lungs               |        |              |       |
|             | viii. Practice physical distancing by avoiding                                     |        |              |       |

|    |                                                                     |  |  |  |
|----|---------------------------------------------------------------------|--|--|--|
|    | ix. Unnecessary travel and staying away from large groups of people |  |  |  |
| 19 | <b>The following are reasons for wearing a mask-</b>                |  |  |  |
|    | i. Being in crowded places                                          |  |  |  |
|    | ii. Being near people who are coughing                              |  |  |  |
|    | iii. When I am sick                                                 |  |  |  |

**Thank you for taking the time to respond thoughtfully to these questions**
